# Supplementary material for: Stereoselective total synthesis of ent-hyptenolide
Source: Royal Society of Chemistry journal article supplement (doi:10.1039/c4ra13708f), 2014-12-22
Supplement: c4ra13708f1.pdf [file c4ra13708f1.pdf]

## SUPPORTING INFORMATION

### Stereoselective total synthesis of *ent*-Hyptenolide

*Gembali Manikanta, Galla Raju and Palakodety Radha Krishna\**

*Organic & Biomolecular Chemistry Division, CSIR-Indian Institute of Chemical  
Technology, Hyderabad-500 007, India.*

E-mail: [prkgenius@iict.res.in](mailto:prkgenius@iict.res.in)

---

### CONTENTS

|                                                                    |     |
|--------------------------------------------------------------------|-----|
| <sup>1</sup> H and <sup>13</sup> C Spectrum of compound <b>8</b>   | S2  |
| <sup>1</sup> H and <sup>13</sup> C Spectrum of compound <b>9</b>   | S3  |
| <sup>1</sup> H and <sup>13</sup> C Spectrum of compound <b>10</b>  | S4  |
| <sup>1</sup> H and <sup>13</sup> C Spectrum of compound <b>3</b>   | S5  |
| <sup>1</sup> H and <sup>13</sup> C Spectrum of compound <b>11</b>  | S6  |
| <sup>1</sup> H and <sup>13</sup> C Spectrum of compound <b>13</b>  | S7  |
| <sup>1</sup> H and <sup>13</sup> C Spectrum of compound <b>12a</b> | S8  |
| <sup>1</sup> H and <sup>13</sup> C Spectrum of compound <b>14</b>  | S9  |
| <sup>1</sup> H Spectrum of compound <b>14a</b>                     | S10 |
| <sup>1</sup> H and <sup>13</sup> C Spectrum of compound <b>15</b>  | S11 |
| <sup>1</sup> H and <sup>13</sup> C Spectrum of compound <b>2</b>   | S12 |
| <sup>1</sup> H and <sup>13</sup> C Spectrum of compound <b>16</b>  | S13 |
| <sup>1</sup> H and <sup>13</sup> C Spectrum of compound <b>1</b>   | S14 |

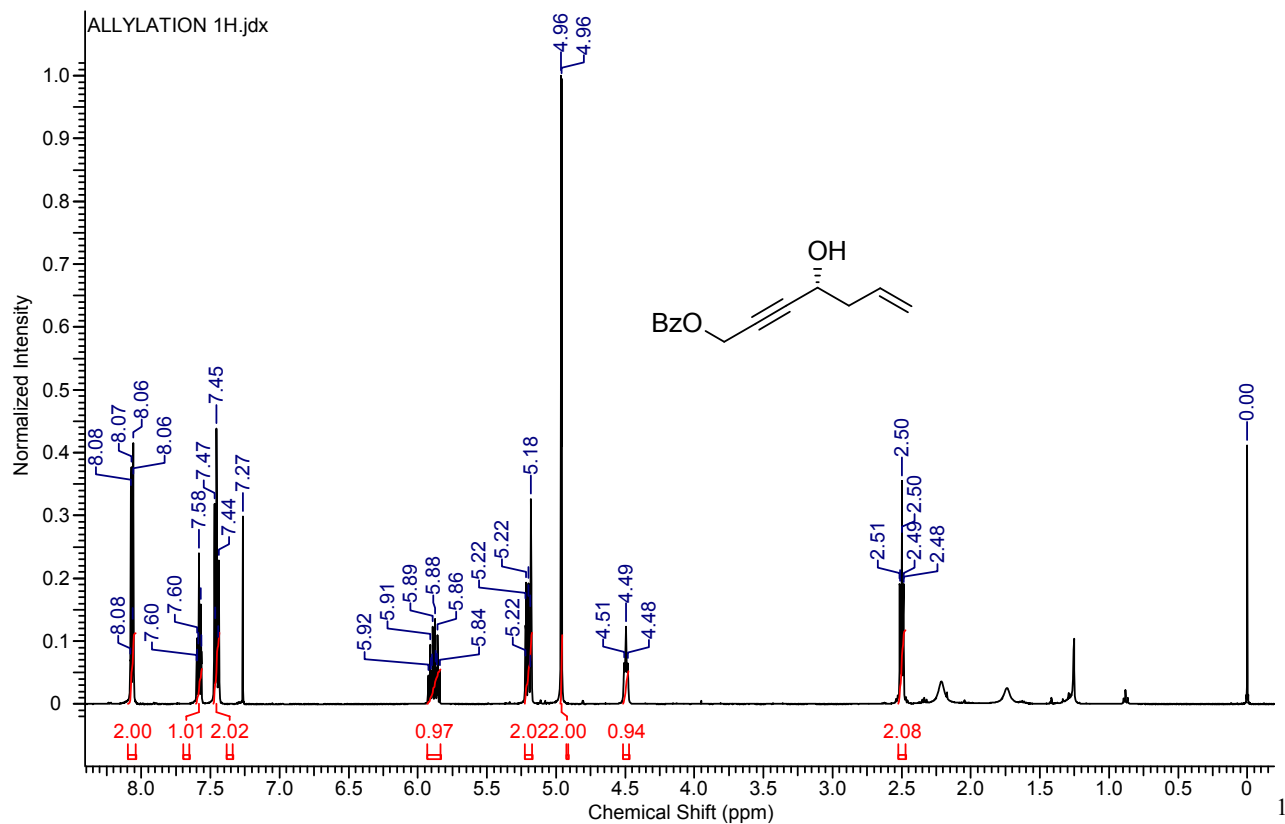

H NMR Spectrum of compound **8** in  $\text{CDCl}_3$  (500 MHz)

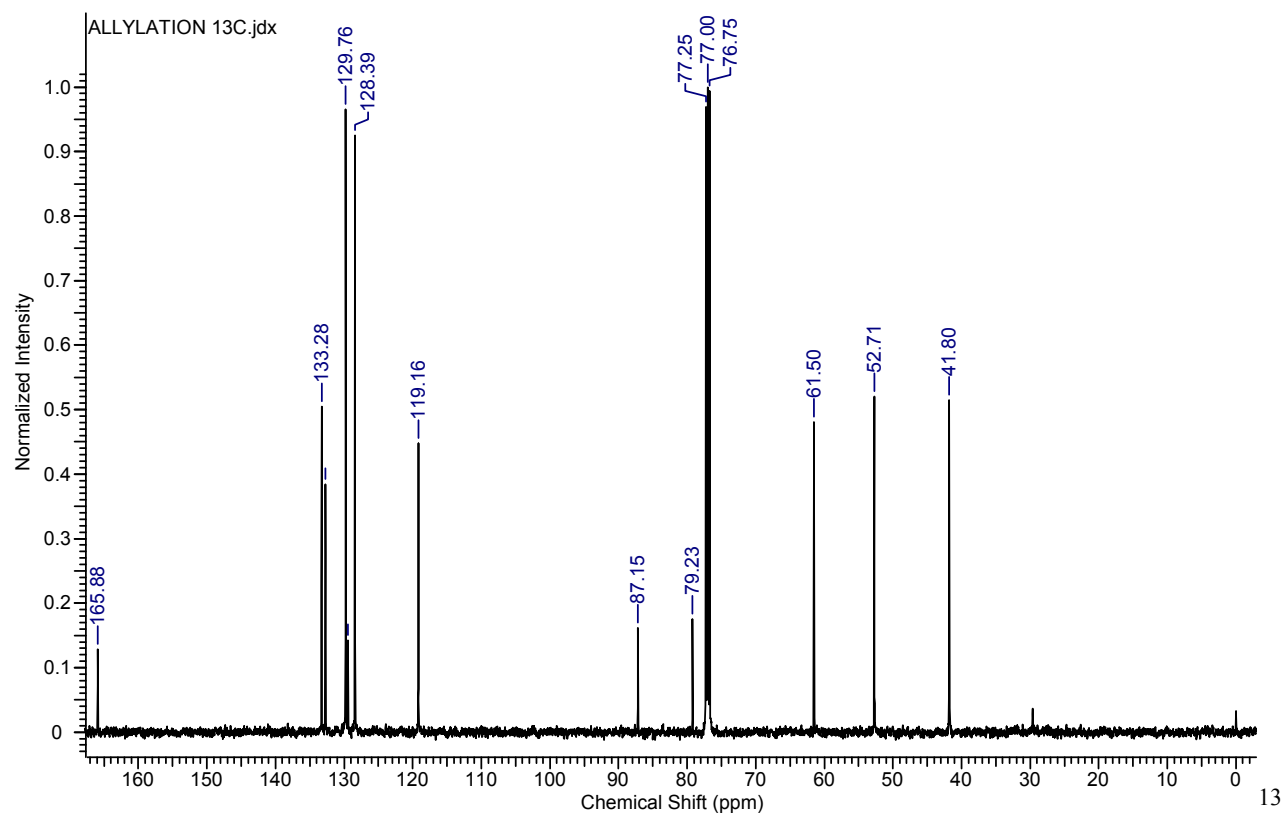

C NMR Spectrum of compound **8** in CDCl<sub>3</sub> (125 MHz)

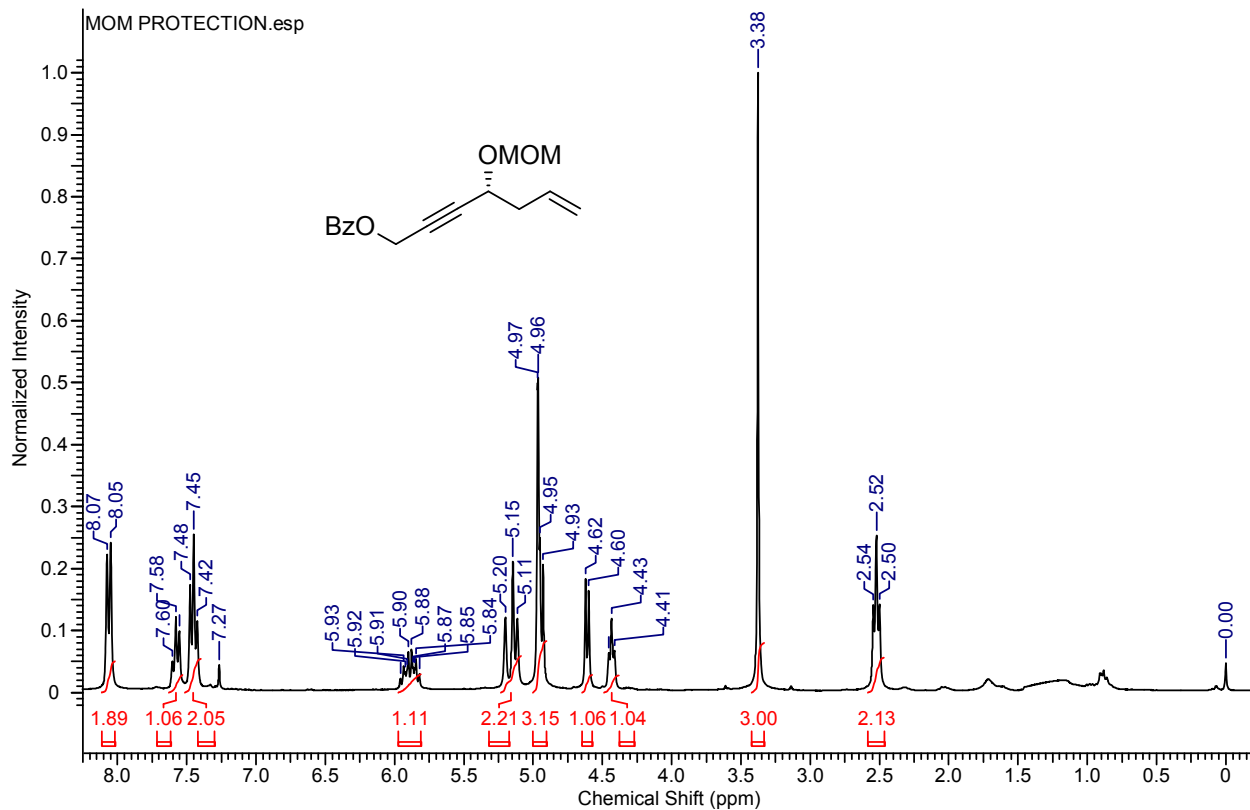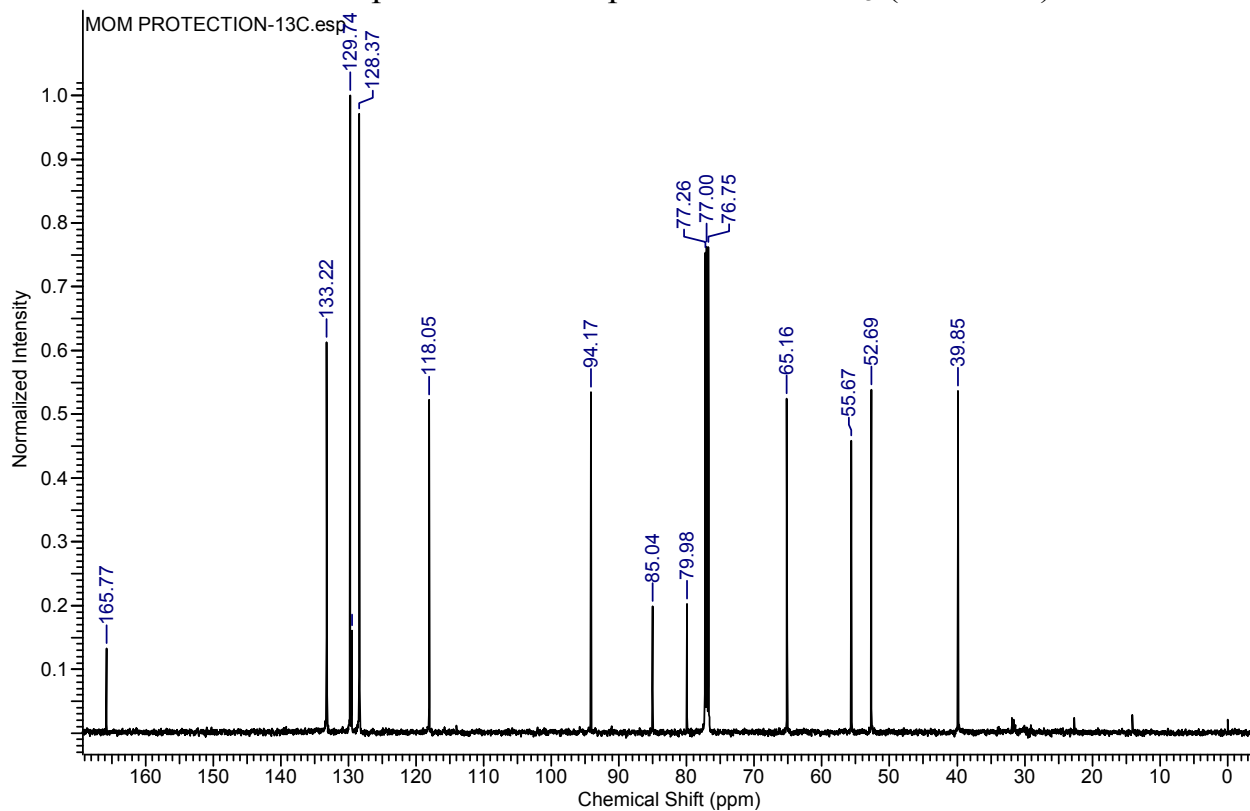

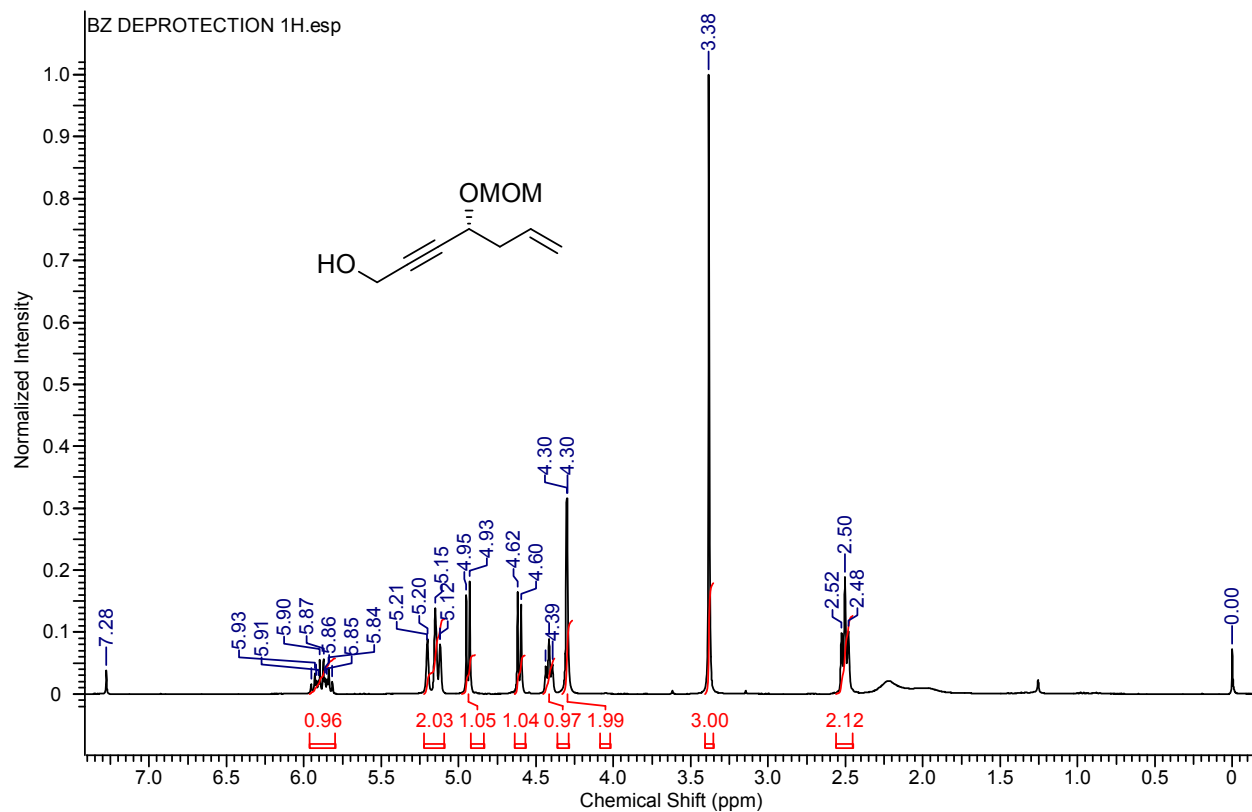

<sup>1</sup>H NMR Spectrum of compound **10** in CDCl<sub>3</sub> (300 MHz)

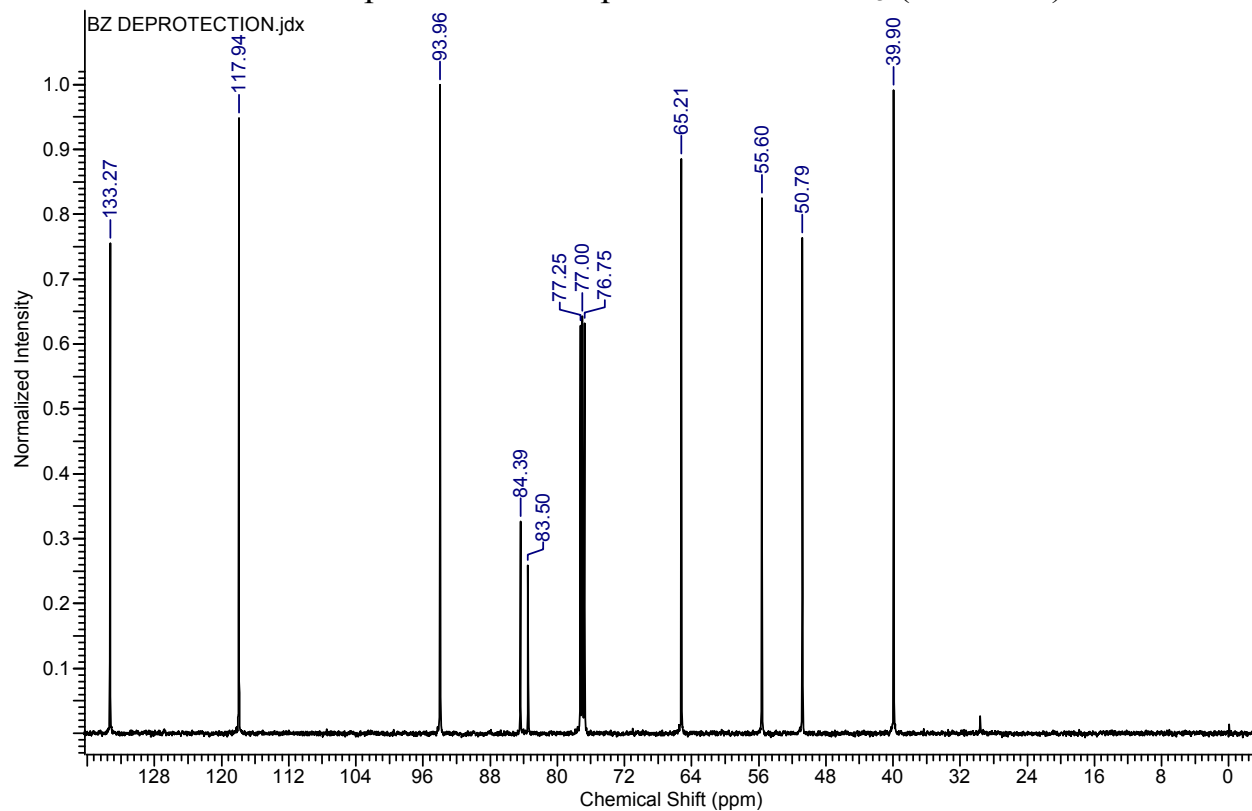

<sup>13</sup>C NMR Spectrum of compound **10** in CDCl<sub>3</sub> (125 MHz)

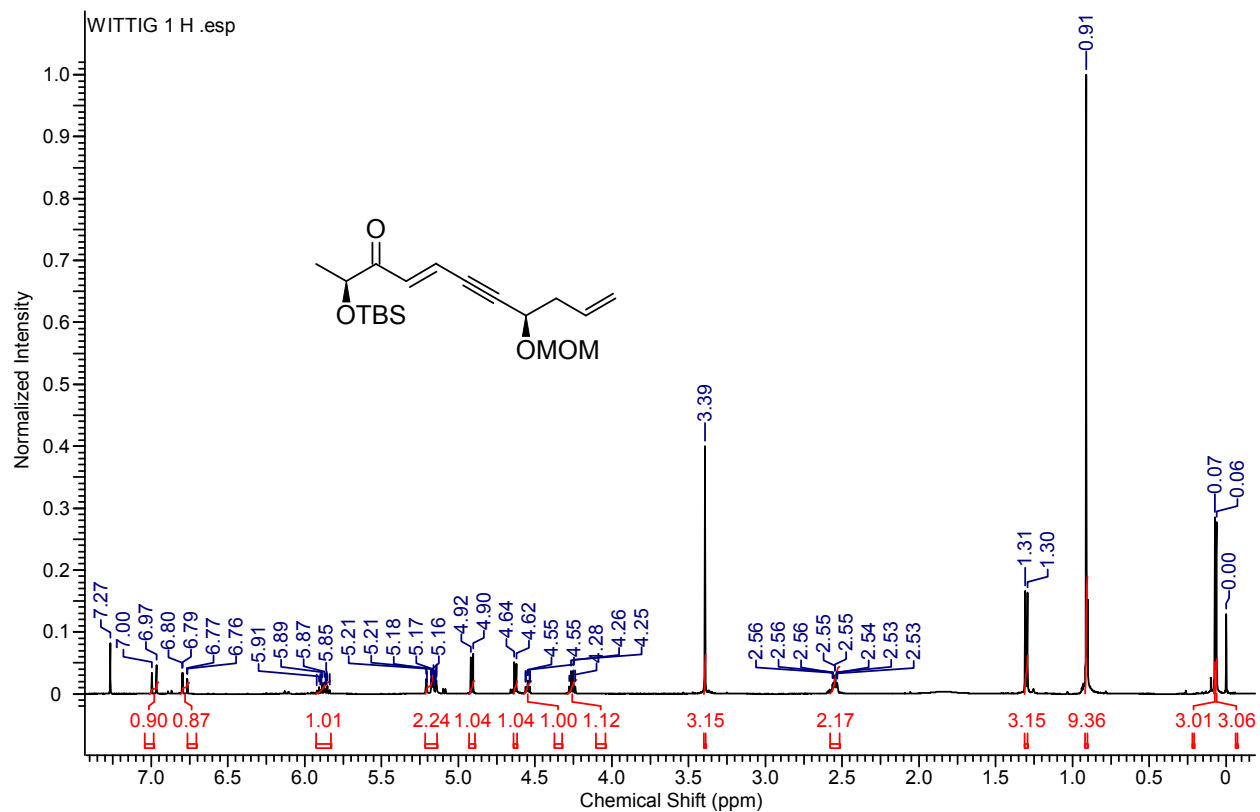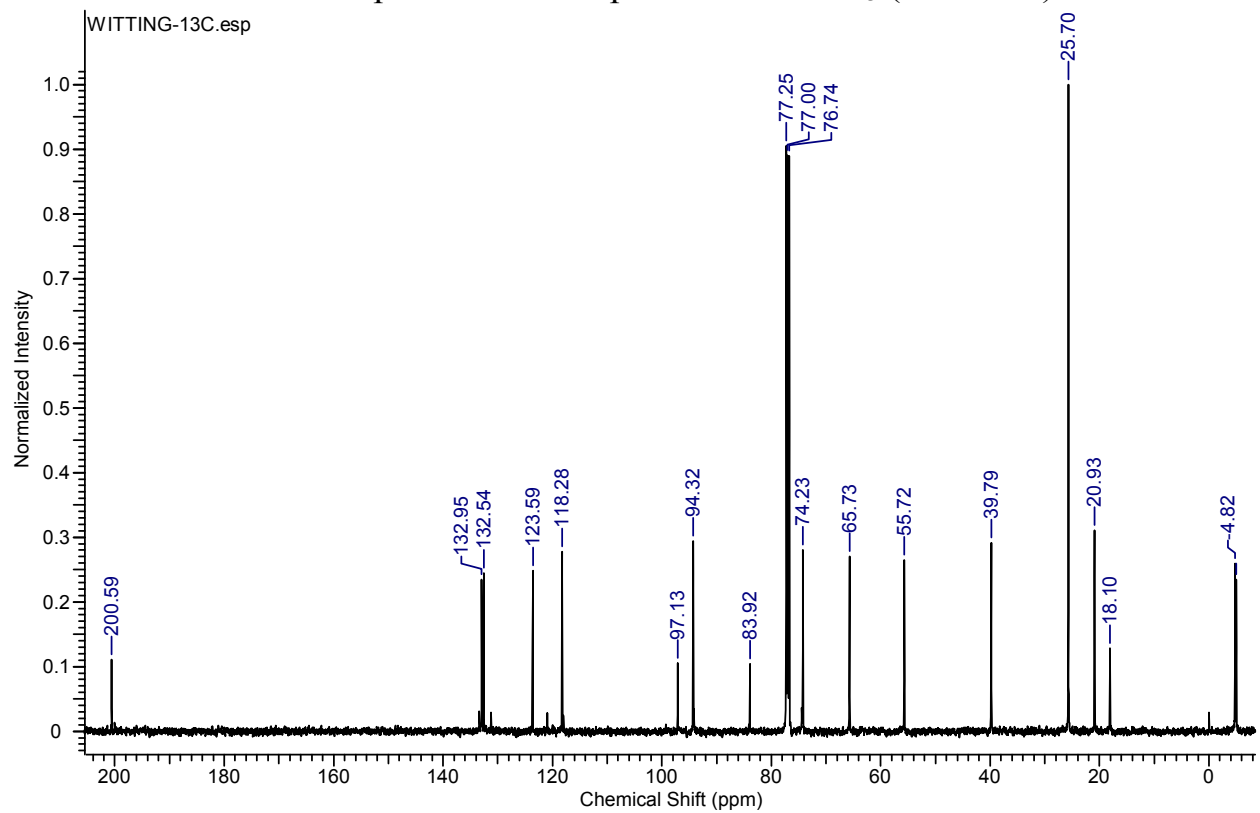

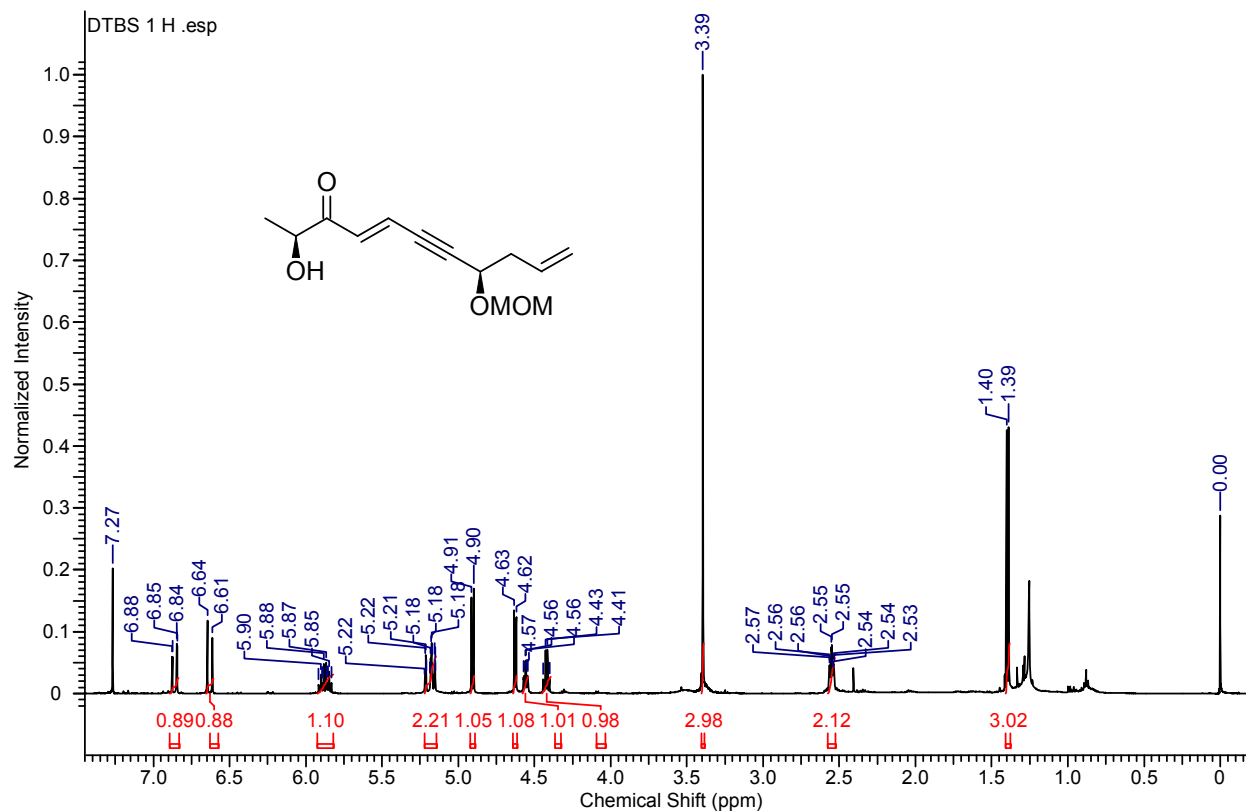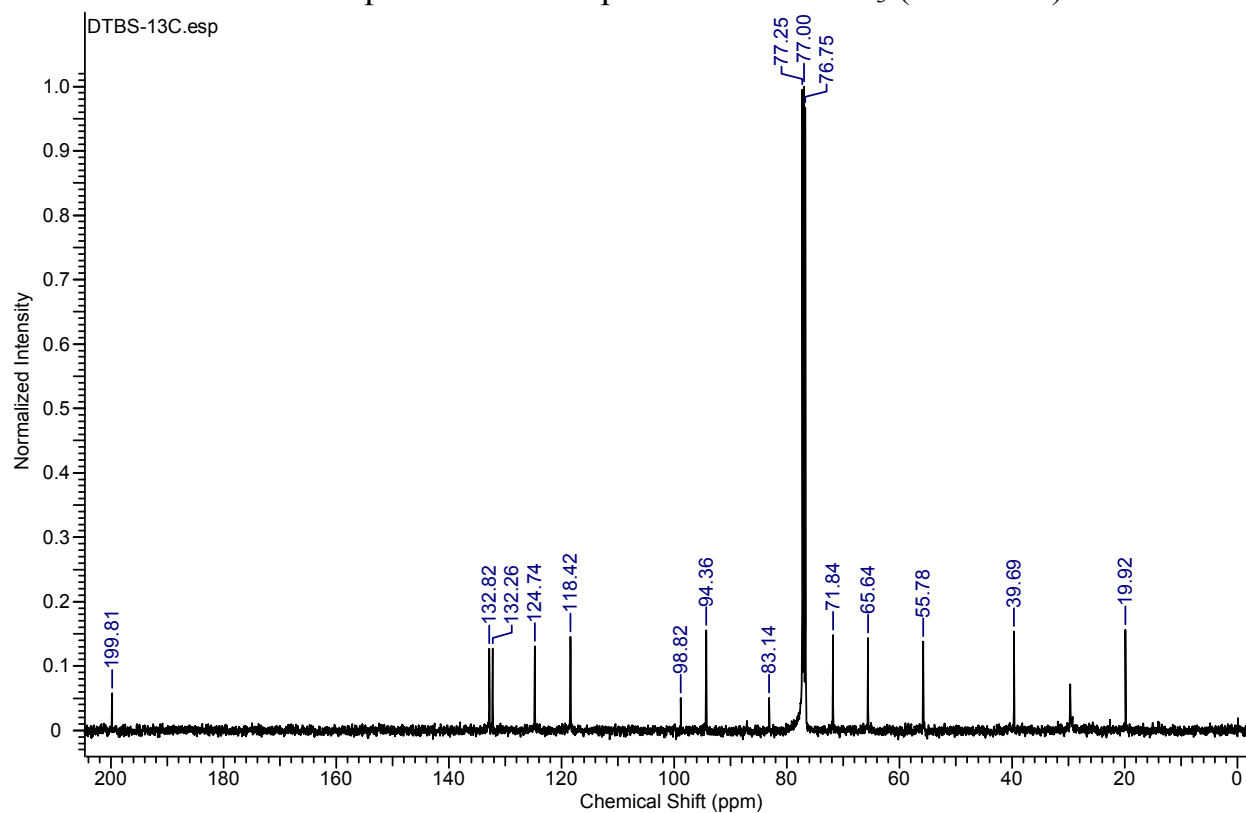

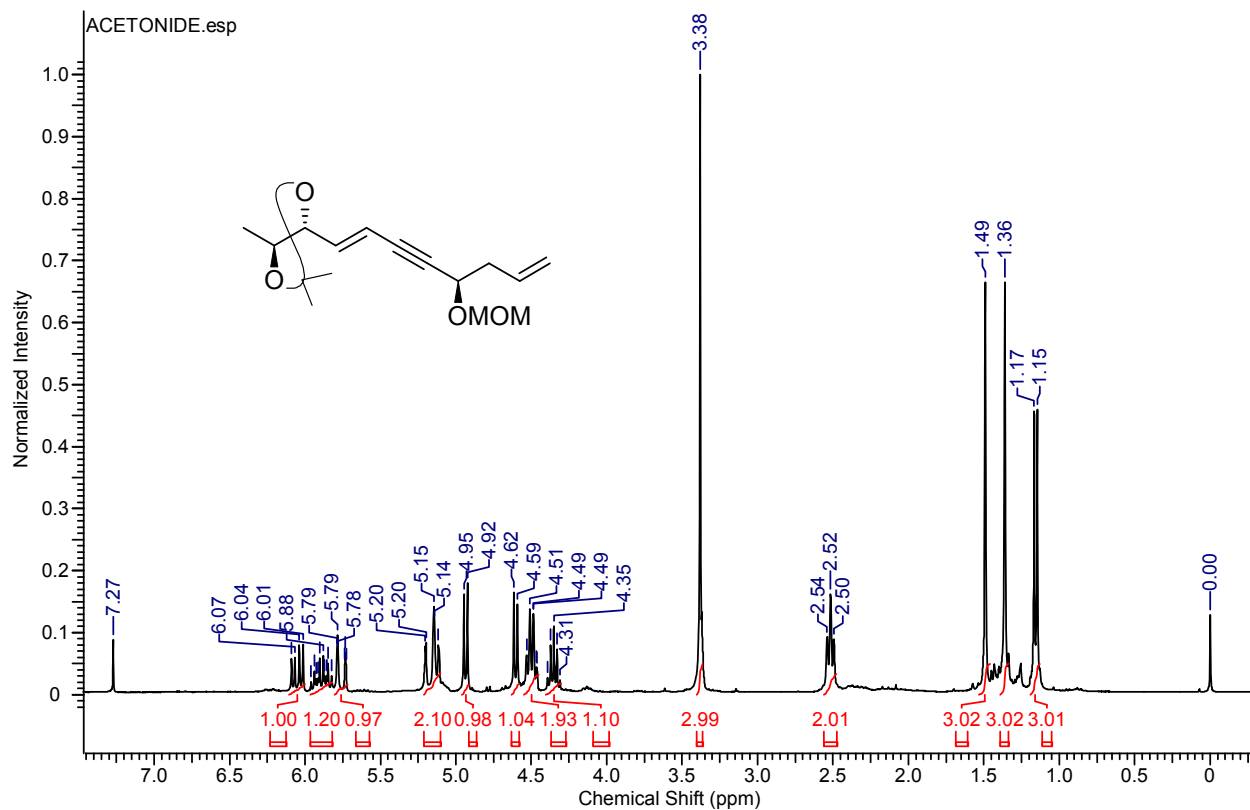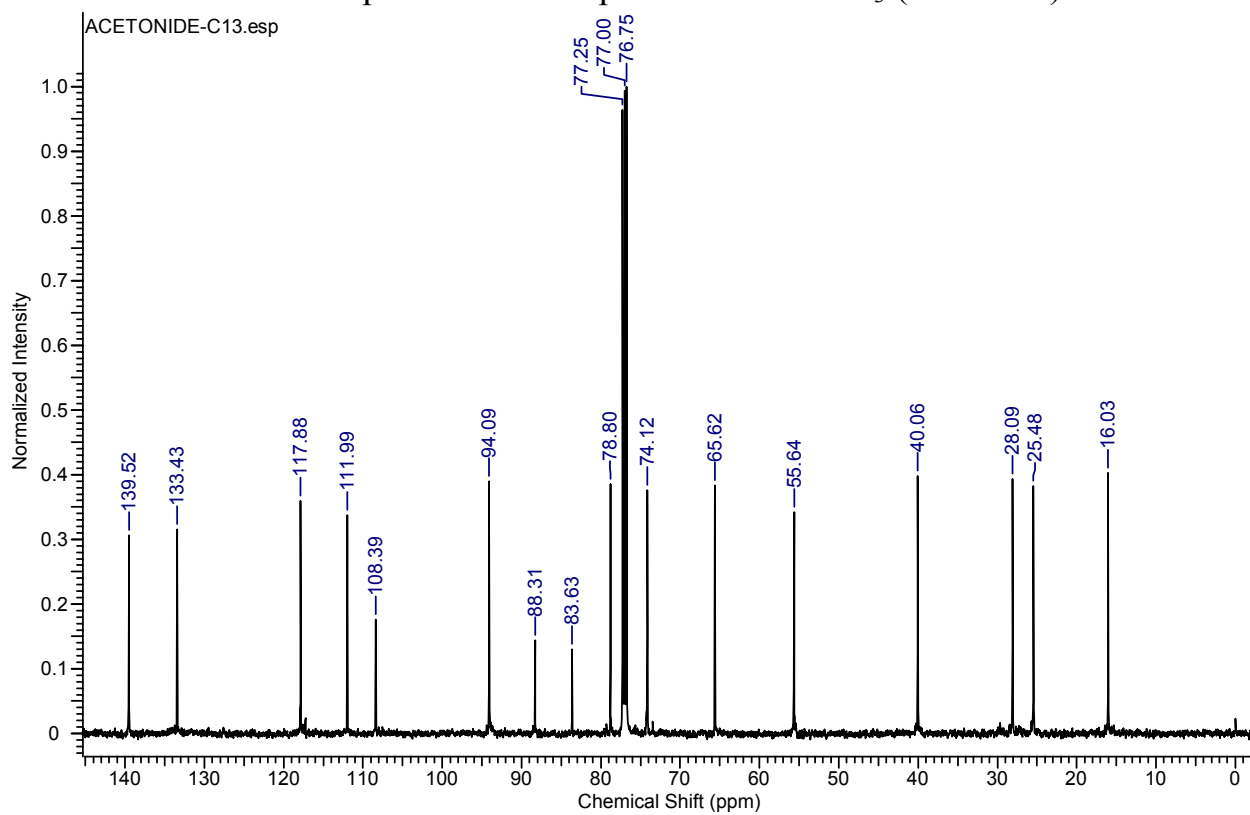



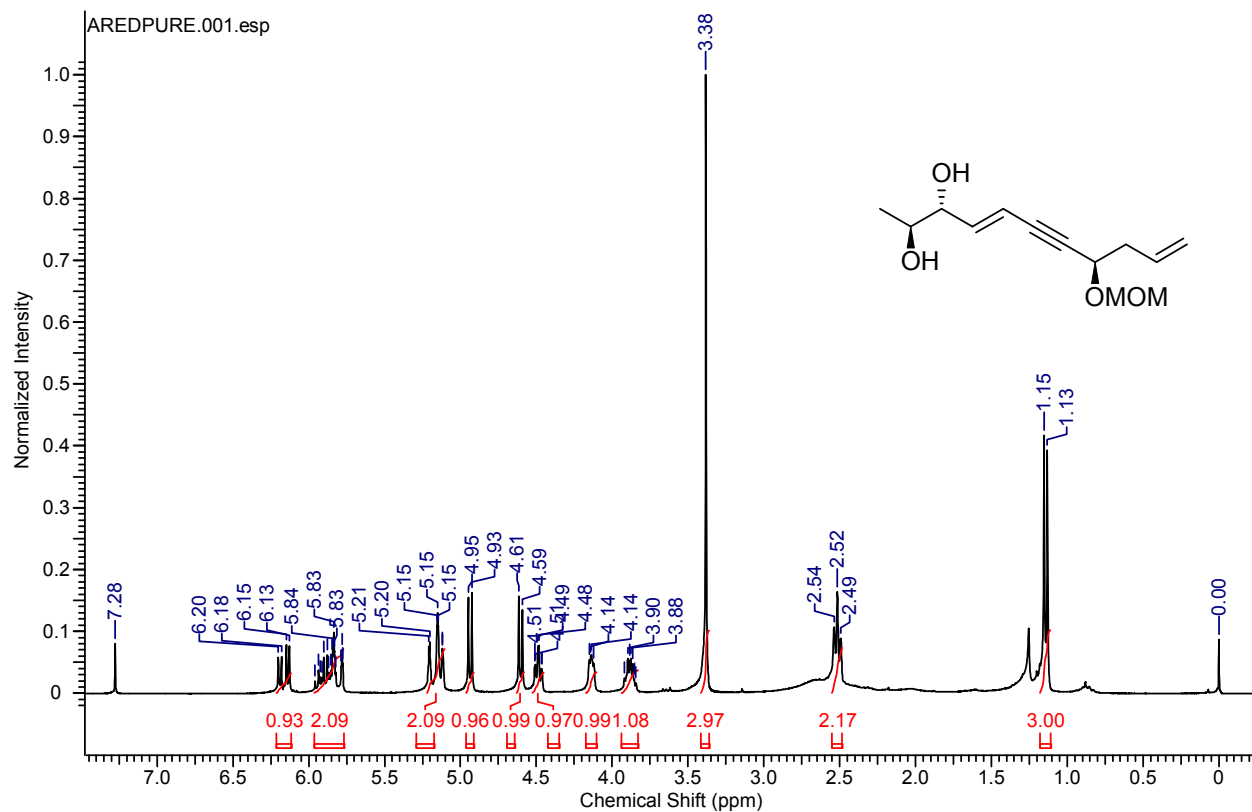

$^1\text{H}$  NMR Spectrum of compound **12a** in  $\text{CDCl}_3$  (300 MHz)

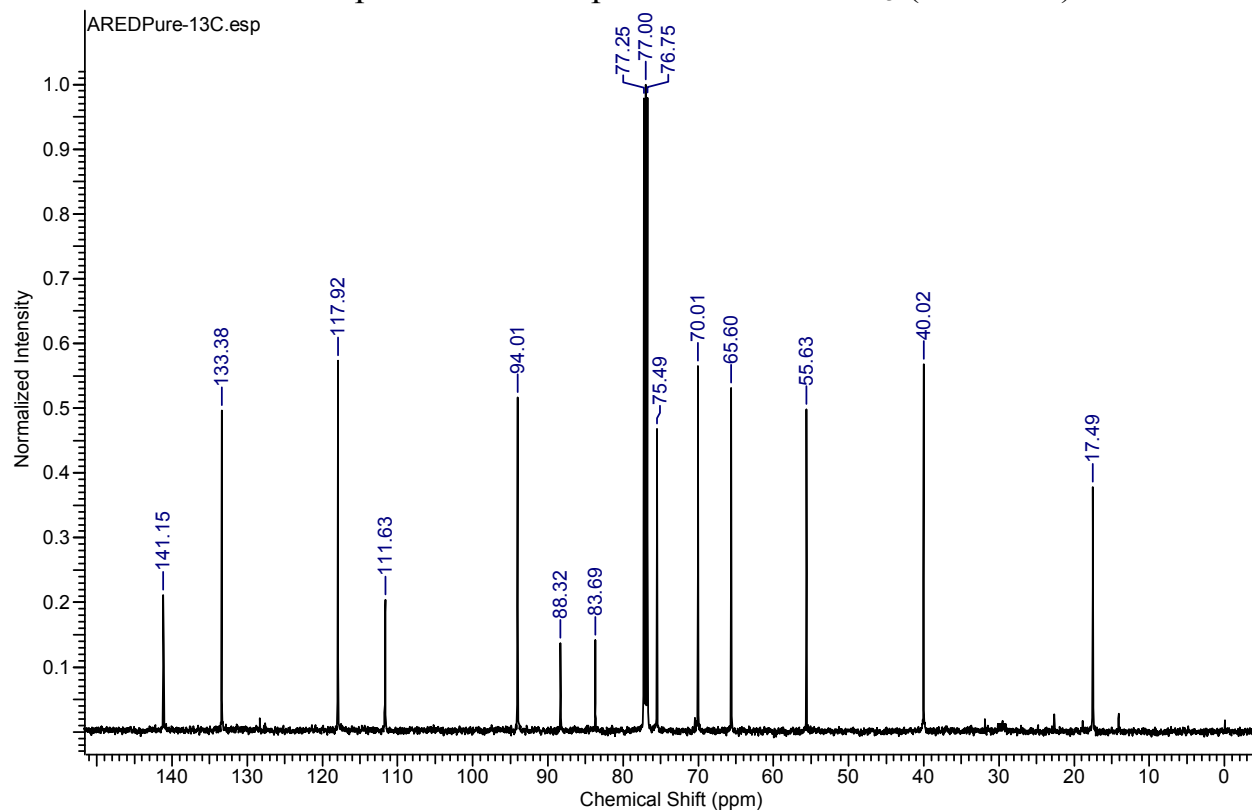

$^{13}\text{C}$  NMR Spectrum of compound **12a** in  $\text{CDCl}_3$  (125 MHz)

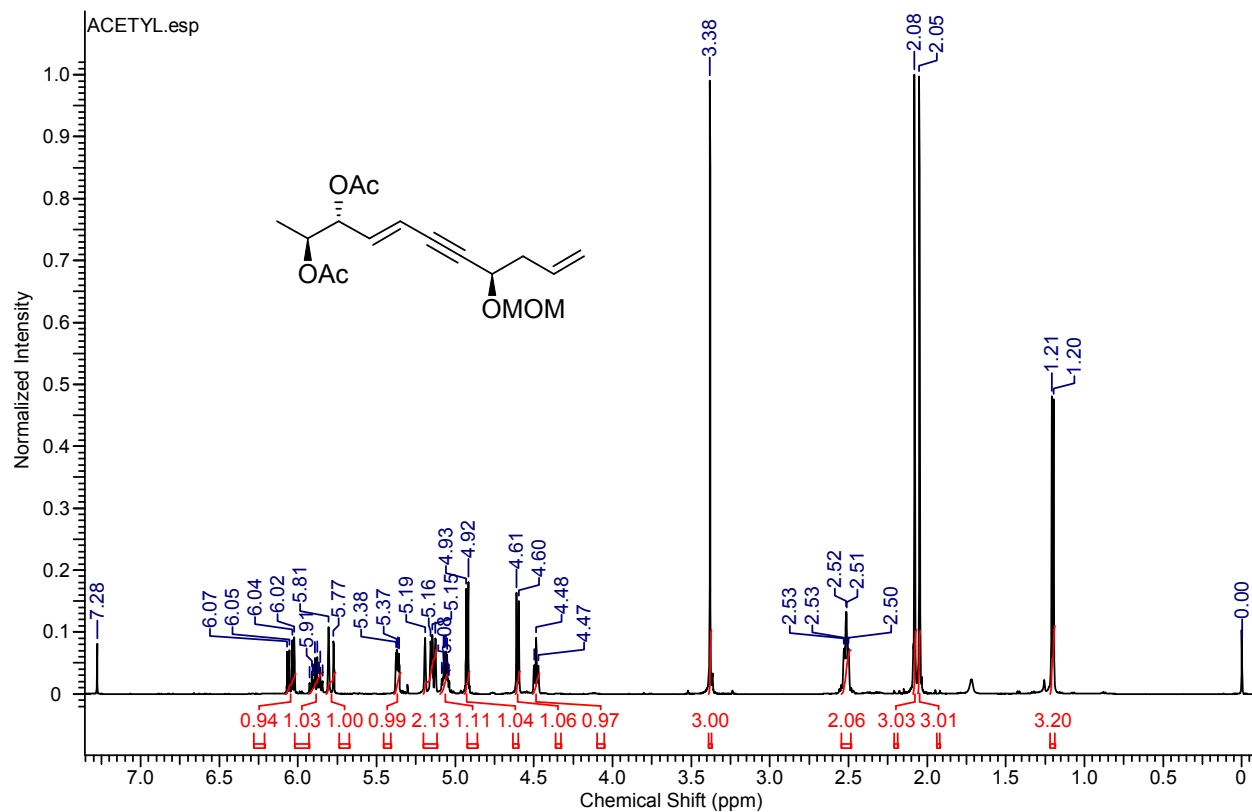

<sup>1</sup>H NMR Spectrum of compound **14** in CDCl<sub>3</sub> (500 MHz)

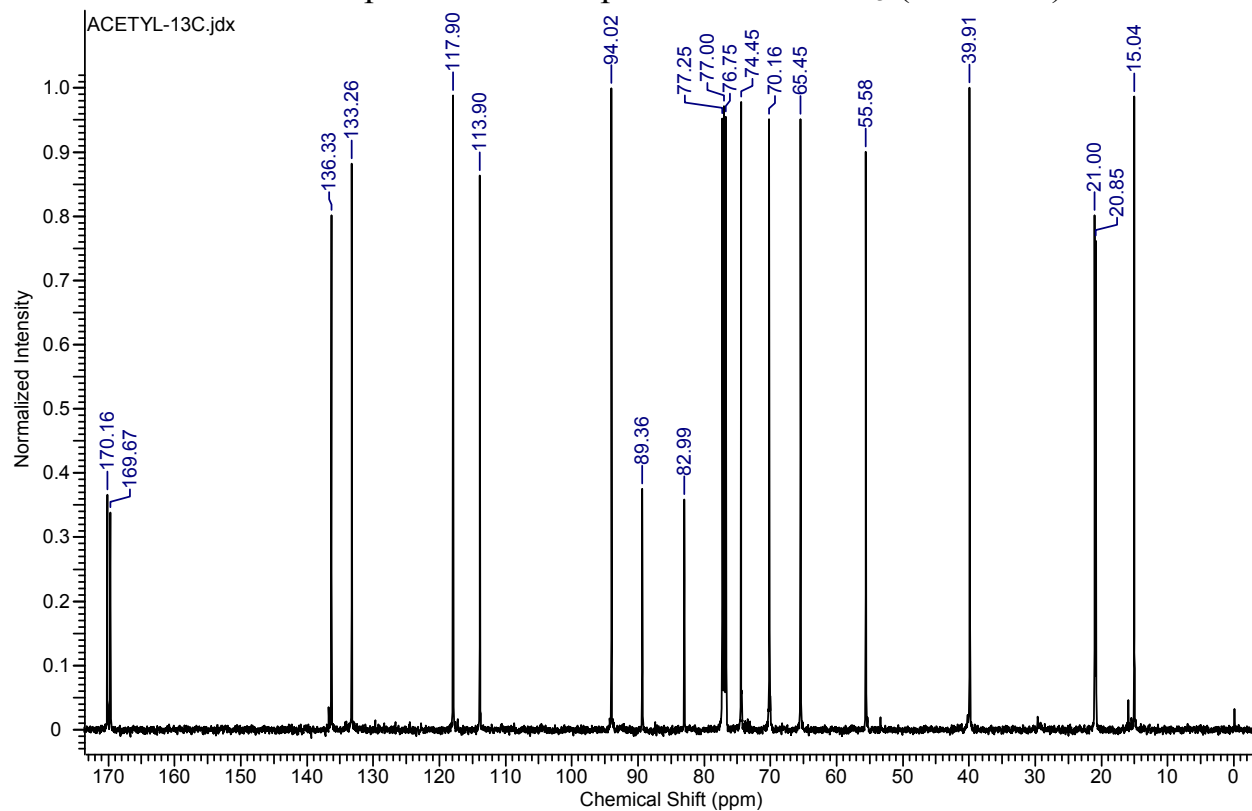

<sup>13</sup>C NMR Spectrum of compound **14** in CDCl<sub>3</sub> (125 MHz)

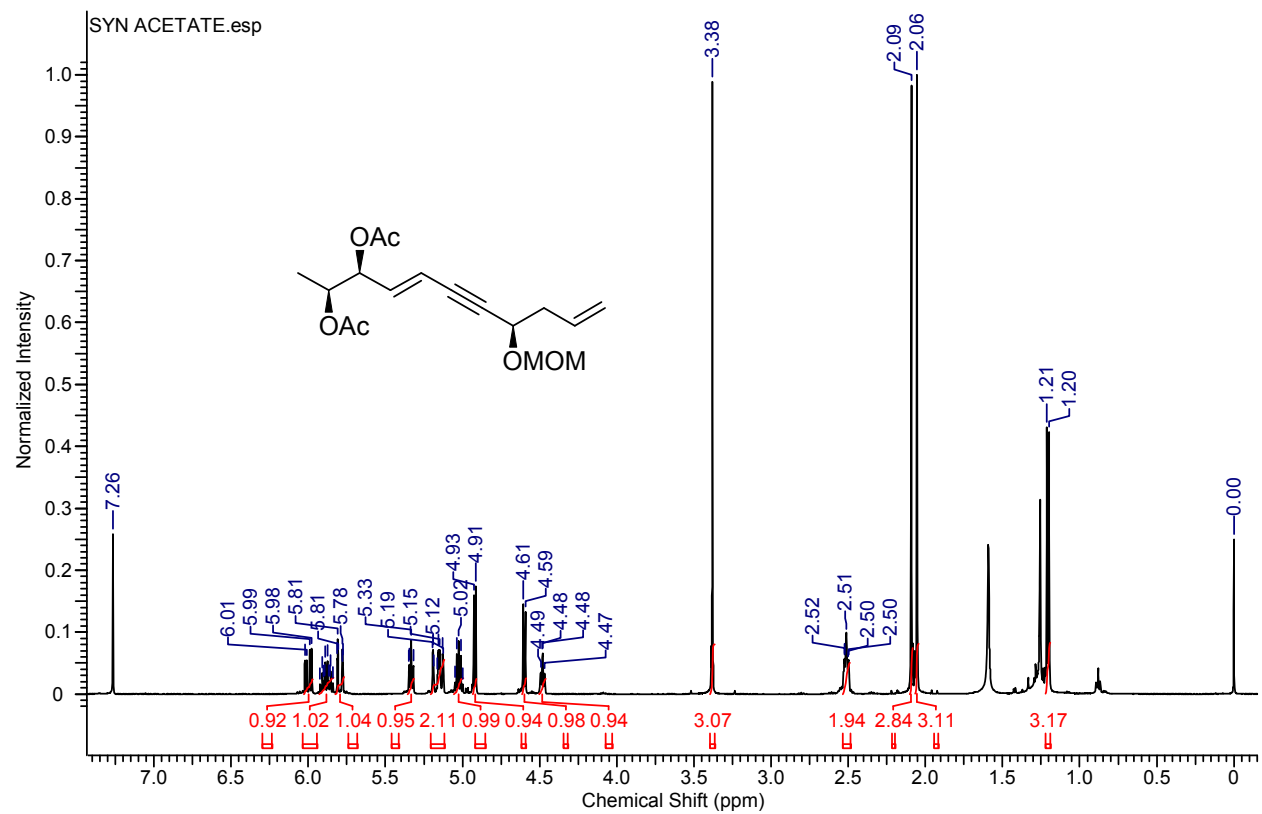

$^1\text{H}$  NMR Spectrum of compound **14a** in  $\text{CDCl}_3$  (500 MHz)

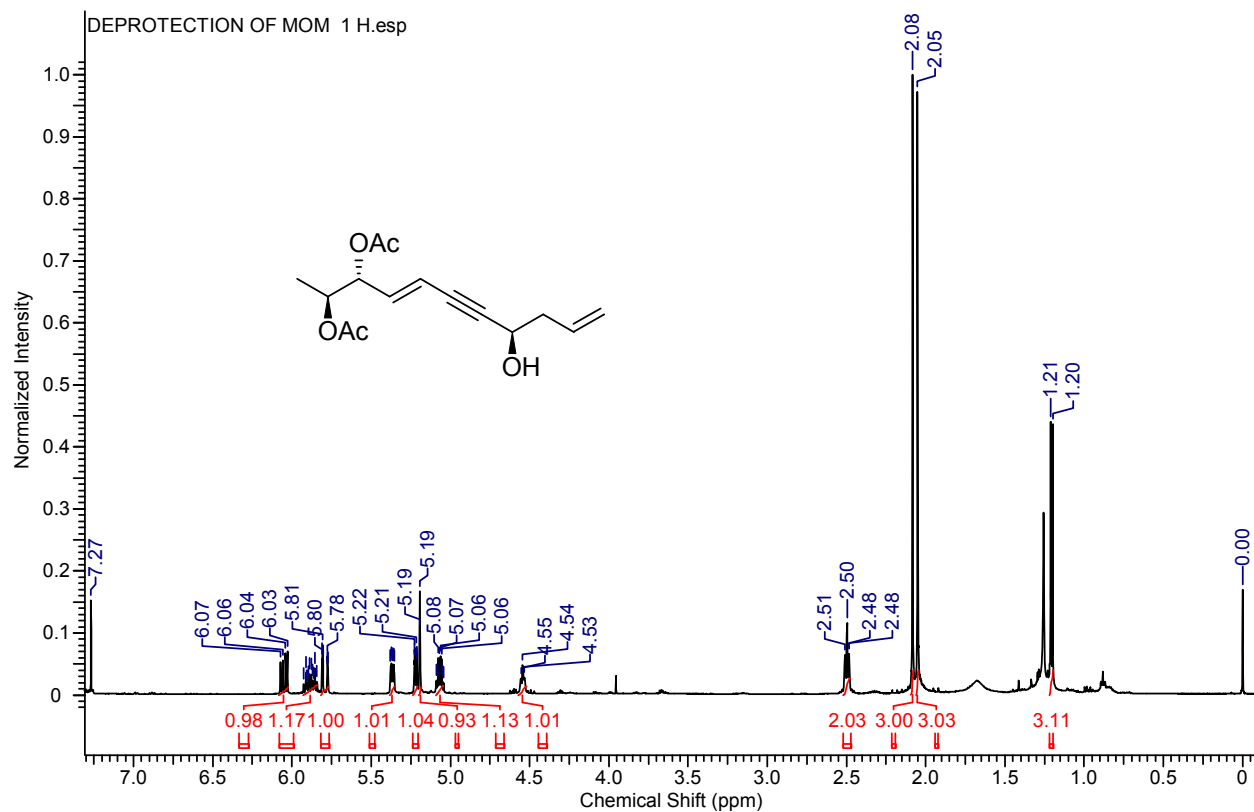

<sup>1</sup>H NMR Spectrum of compound **15** in CDCl<sub>3</sub> (500 MHz)

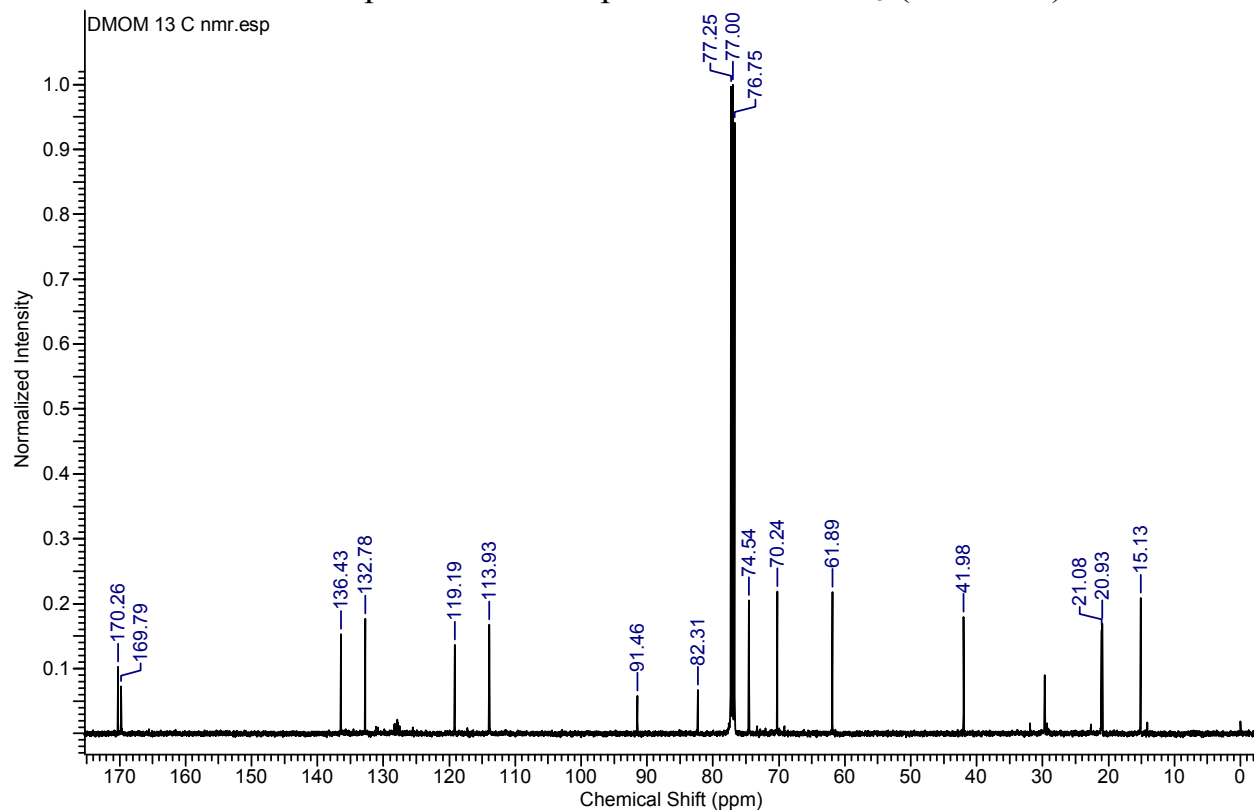

<sup>13</sup>C NMR Spectrum of compound **15** in CDCl<sub>3</sub> (125 MHz)

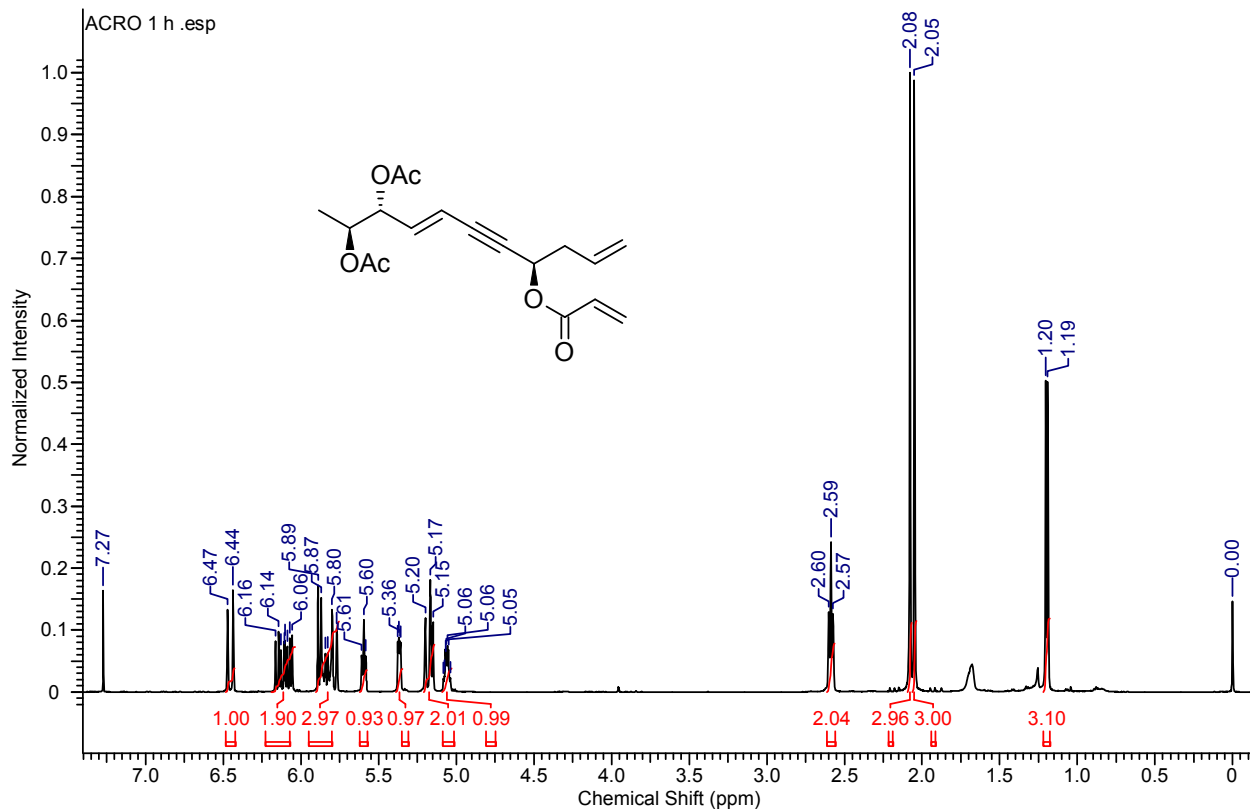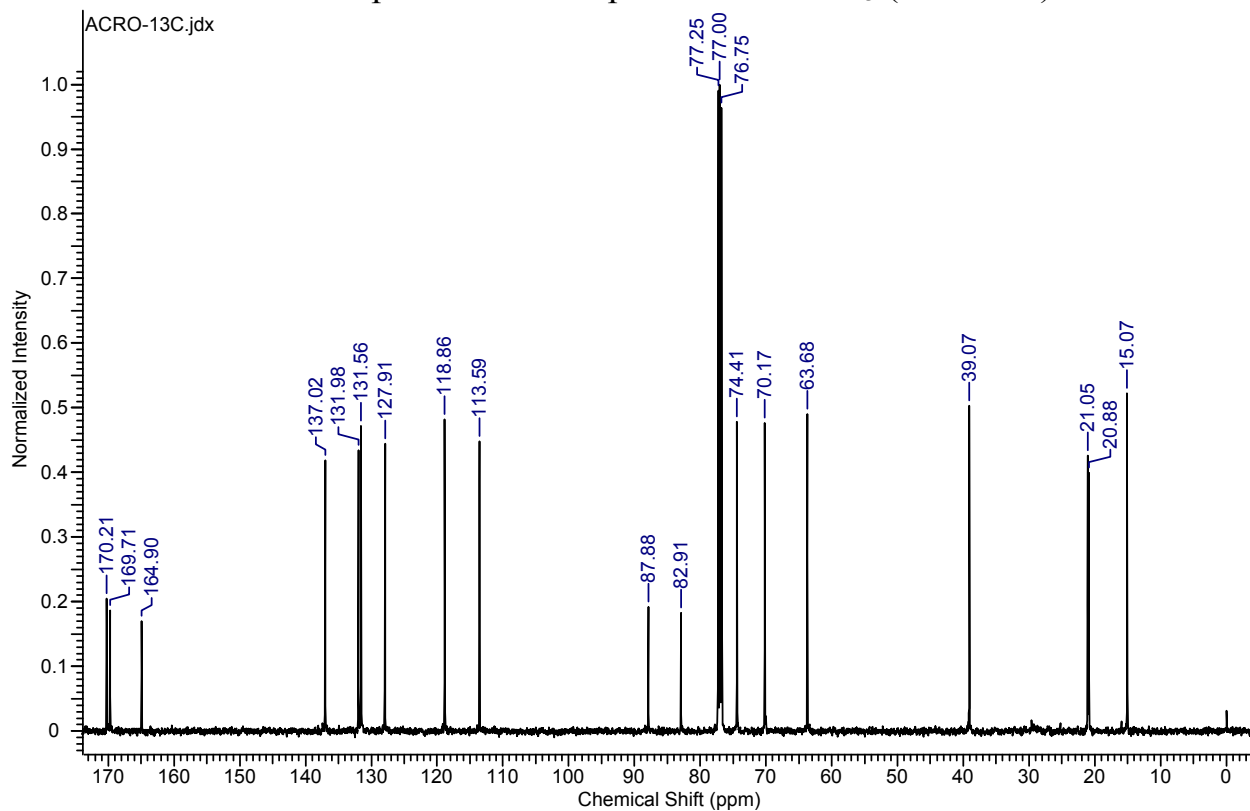

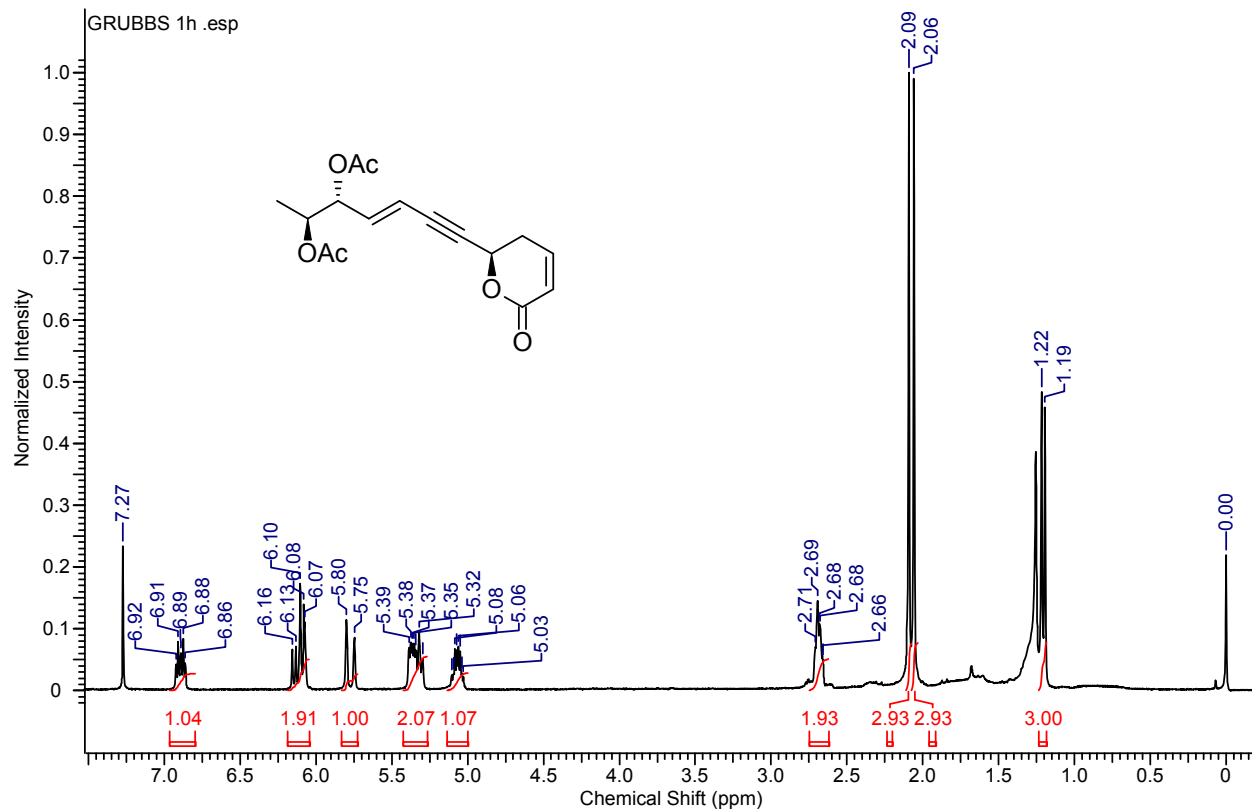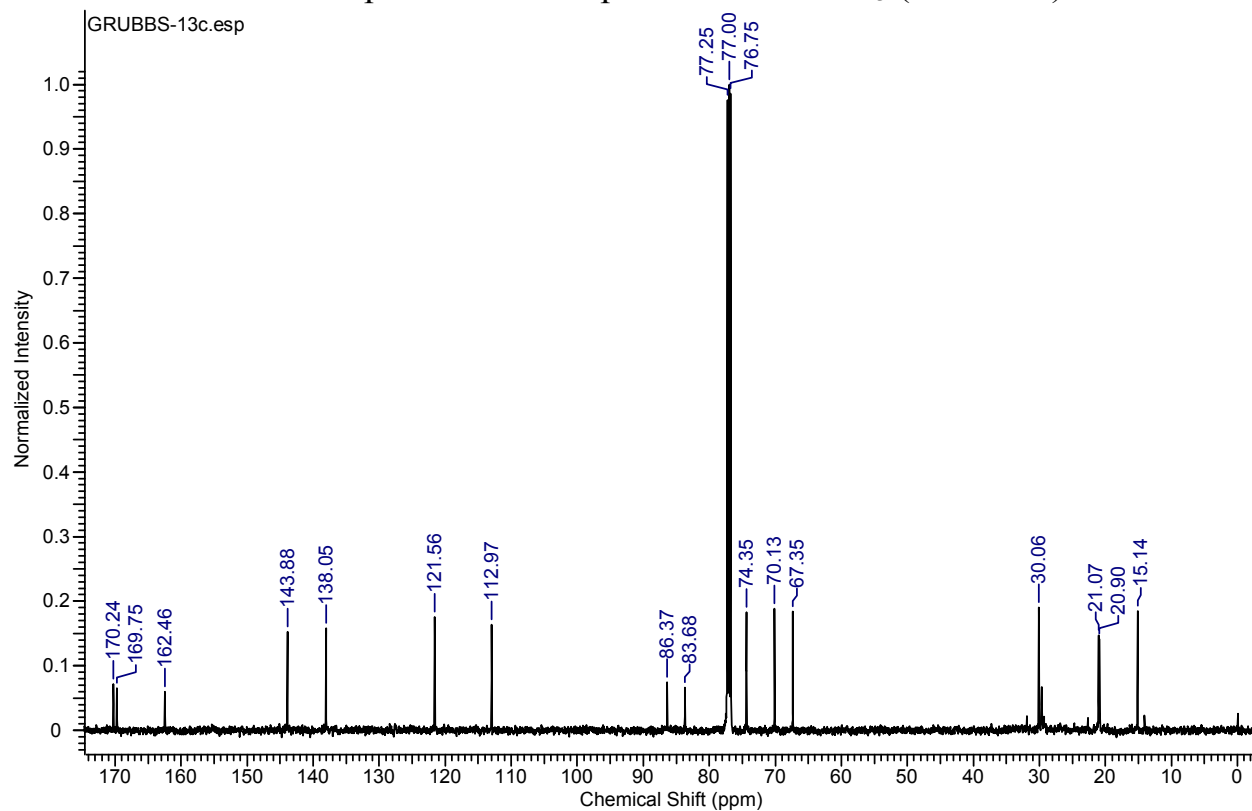

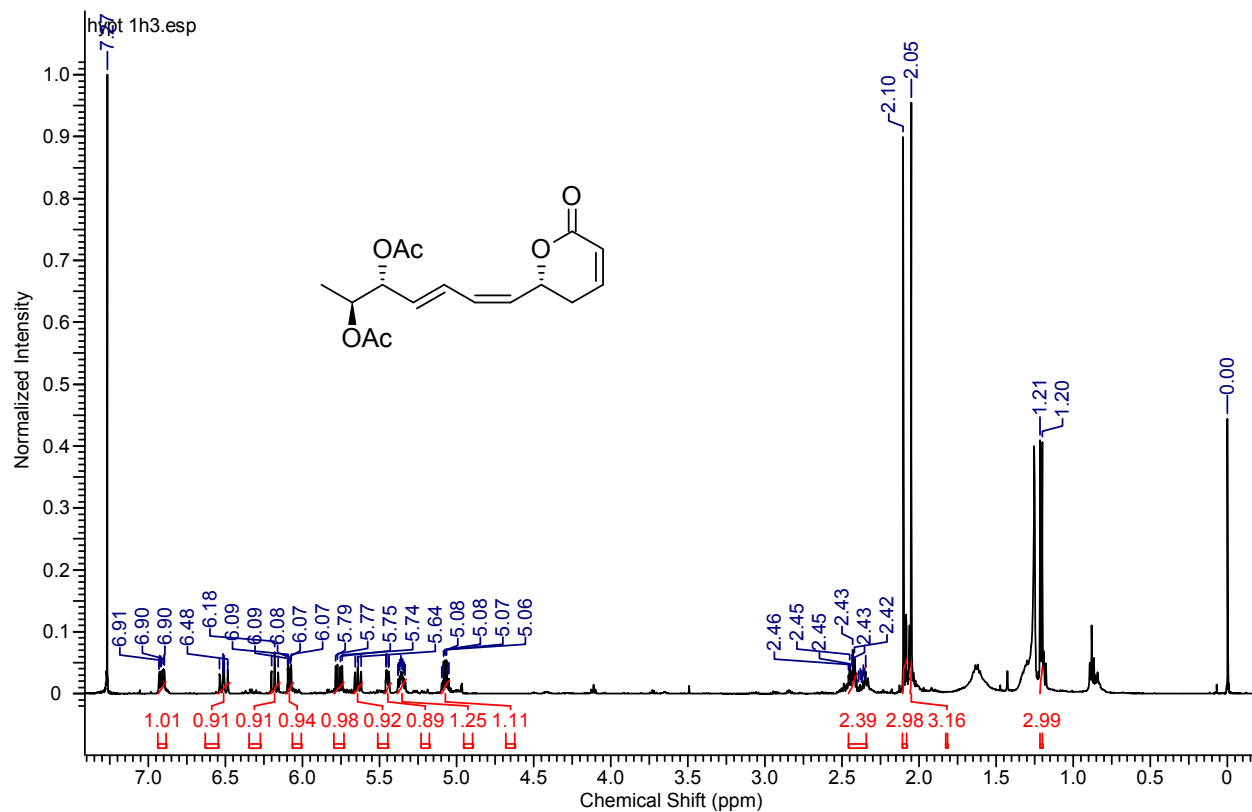

<sup>1</sup>H NMR Spectrum of compound 1 in CDCl<sub>3</sub> (500 MHz)

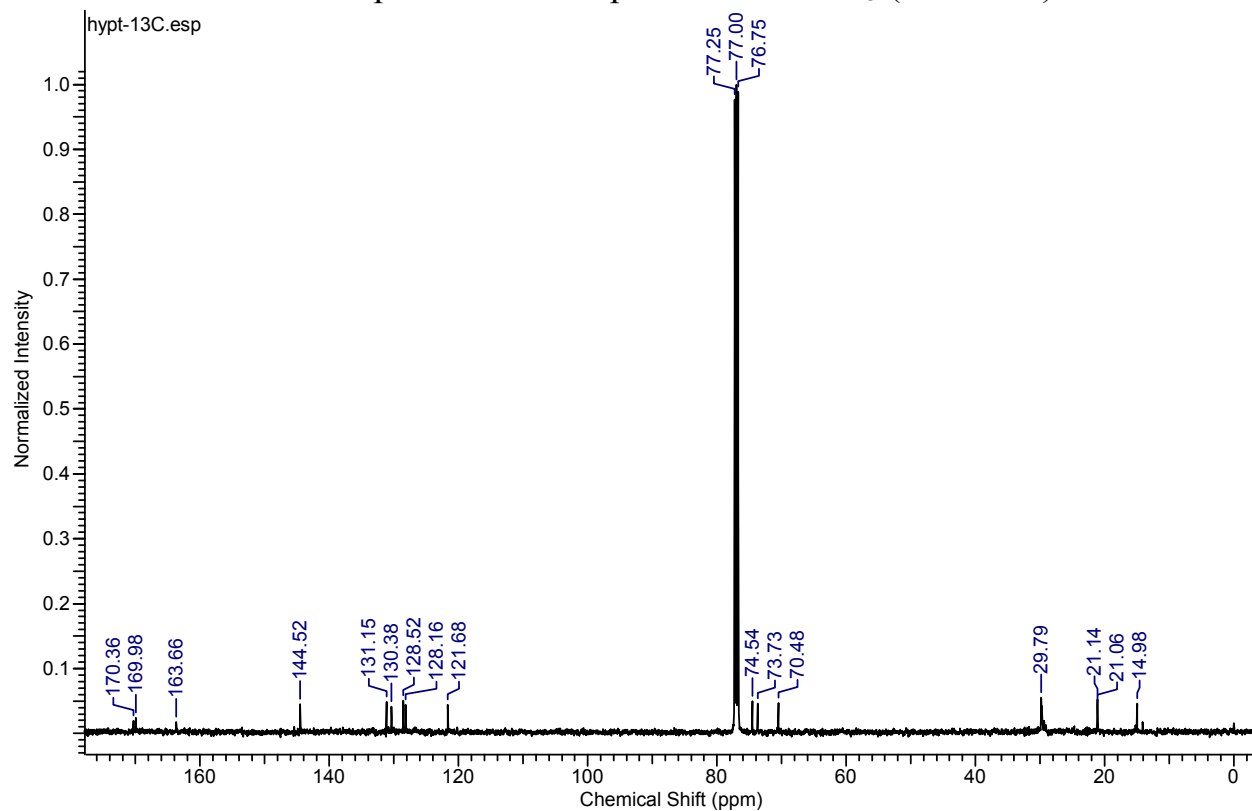

<sup>13</sup>C NMR Spectrum of compound 1 in CDCl<sub>3</sub> (125 MHz)
